# Supplementary material
Source: Springer Nature journal article supplement (https://www.springermedizin.de/resource/supplementary/13223_2013_416_MOESM1_ESM.pdf/9596622)
Supplement: MOESM1 [file 9596622]

Children screened: 118

Exclusion

negative open challenge: 18  
atopic: 2  
bronchial asthma: 1  
no return: 3  
return only once: 5  
likely to outgrow HE allergy: 46

Children unlikely to outgrow HE allergy: 43

OIT group: 30

untreated group: 13

Achieved oral tolerance induction ?

Achieved oral tolerance induction ?

Yes: 9

No: 21

Yes: 0

No: 13

Observed for a year

Achieved oral tolerance induction ?

Observed OIT group for another year

Yes: 17

No: 13

Obtained clinical tolerance:  
11/14 (78.6%)
